# Supplementary material
Source: PubMed Central journal article supplement (PMC3153959)
Supplement: NIHMS312999-supplement-1.pdf [file NIHMS312999-supplement-1.pdf]

Luther Fenton SI 2008-08-08476C.pdf

Supplementary Information.

Format: PDF

S1.mov

Video showing atrial fibrillation (AF) and successful termination of AF (see Fig. 1c and e).

The color indicates membrane potential (black = resting, red activated; c.f. color bar given in Fig. 1e).

The times of the five AFP pulses are indicated by a red square. The field of view is 4 x 4 cm<sup>2</sup>.

Note that during AFP, waves originate both from boundaries and from inside the tissue.

Format: quicktime movie

S2.mov

Video showing normal sinus rhythm (see Fig. 1e).

The color indicates membrane potential (black = resting, red activated; c.f. color bar given in Fig. 1e).

The field of view is 4 x 4 cm<sup>2</sup>.

Format: quicktime movie

S3.mov

Videos showing representative examples of wave propagation in quiescent tissue induced by

weak electric field pulses with  $E = 0.22$  V/cm,  $E = 0.39$  V/cm and  $E = 0.5$  V/cm, respectively (pulse duration 8 ms).

The color indicated time (early = red, late = blue; see Fig. 2).

S4.mov, ..., S7.mov

Videos showing simulations corresponding to Figure S10, panels AD.

The simulations have been done using the Barkley model.

The color indicates the fast activator variable (blue = resting, red = activated).

The text at the beginning of each video indicates pacing sites and relative frequencies.

During the simulations, phase singularity trajectories are tracked where appropriate (indicated by white color).

Format: quicktime movie

S8.mov

Video showing AF and successful termination using direct access to the core (Fig. 4e).

The color indicates membrane potential (black = resting, red activated; c.f. color bar given in Fig. 4d).

The times of the five AFP pulses are indicated by a red square. The field of view is 4 x 4 cm<sup>2</sup>.

Format: quicktime movie

S9

3D interactive Applet for the right atrial vessel structure shown in Fig. 3b.

[http://thevirtualheart.org/vessels/atria/Right\\_atria\\_vessels.html](http://thevirtualheart.org/vessels/atria/Right_atria_vessels.html)

Format: Java applet

S10

3D interactive Applet for the left ventricular vessel structure shown in Fig. 3f.

<http://thevirtualheart.org/vessels/ventricle/vessels1a.html>

Format: Java applet
